# Supplementary material for: Supplementation of Probiotic Butyricicoccus pullicaecorum Mediates Anticancer Effect on Bladder Urothelial Cells by Regulating Butyrate-Responsive Molecular Signatures
Source: MDPI journal article supplement (doi:10.3390/diagnostics11122270), 2021-12-04
Supplement: s1 [file s1]

Supplemental Figures

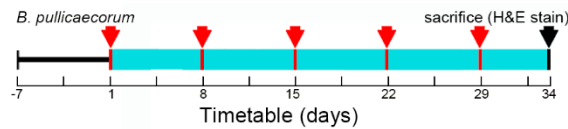

**Supplemental Figure S1.** Timing of *B. pullicaecorum* administration. Red arrow,  $1 \times 10^7$  *B. pullicaecorum* administration. Black arrow, sacrifice and colon sampling of H&E staining.

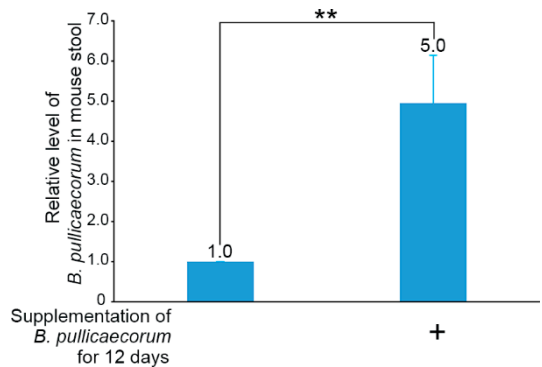

**Supplemental Figure S2.** Relative level of *B. pullicaecorum* in mouse stool. DNA was extracted from stools of mice without or with *B. pullicaecorum* supplementation for 12 days. The quantitative real-time PCR was performed with the Microbial DNA qPCR Assays (BP00080A; Qiagen GmbH) containing one pair of PCR primers and probe for *B. pullicaecorum*, according to the manufacturer's instructions. Each quantitation was normalized with the individual total bacteria level which was acquired by applying the SYBR green method and the universal bacterial primers (5'-GTGSTGCA YGGYYGTCGTCA-3' and 5'-ACGTCRTCCMCNCCTTCCTC-3'; S, C/G; Y, C/T; R, A/G; M, A/C; N, A/C/G/T), published by Walker *et al.* (Microbiome 2015; 3:26). Each experiment was repeated three times independently. \*\* $p < 0.01$ .

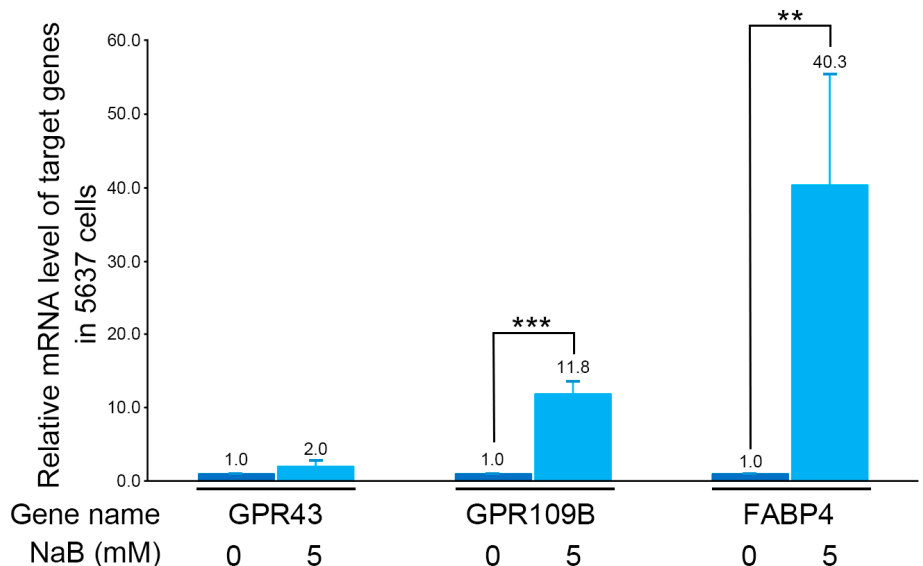

**Supplemental Figure S3.** Relative mRNA level of butyrate-effected genes in 5637 cells. Expressions of GPR43, GPR109B, and FABP4 were determined by quantitative real-time PCR from 5637 cells with 5 mM treatment for 72 h. The concentration of NaB was referred to the report of Wang *et al.* (FASEB J. 2020 34(3):4266). Each experiment was repeated three times independently. NaB, sodium butyrate. \*\* $p < 0.01$ .

0.01; \*\*\* $p < 0.001$ .

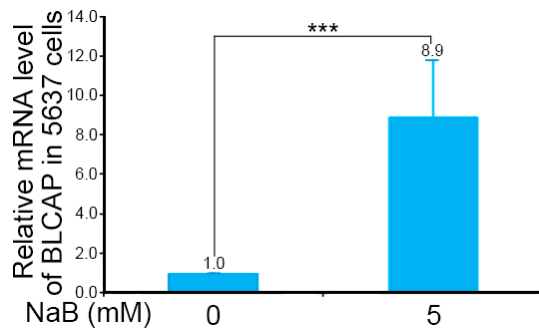

**Supplemental Figure S4.** Relative mRNA level of BLCAP in 5637 cells.

Expressions of BLCAP were determined by quantitative real-time PCR from 5637 cells with 5 mM treatment for 72 h. The concentration of NaB was referred to the report of Wang *et al.* (FASEB J. 2020 34(3):4266). Each experiment was repeated three times independently. NaB, sodium butyrate. \*\*\* $p < 0.001$ .
